# Supplementary material for: Genomes of Endotrypanum monterogeii from Panama and Zelonia costaricensis from Brazil: Expansion of Multigene Families in Leishmaniinae Parasites That Are Close Relatives of Leishmania spp
Source: Pathogens. 2023 Nov 30;12(12):1409. doi: 10.3390/pathogens12121409 (PMC10747355; doi:10.3390/pathogens12121409)
Supplement: Supplementary file 1 [file pathogens-12-01409-s001.zip › Tables Suppl material .xlsx]

## Sheet: Table S1
	List of genomes sequenced in this work and 25 other trypanosomatid genome assemblies.
	Taxa	Life cycle	Genome size (Mb)	Number of genes	Protein source	Genome source	Reference/Sequencer
1	Blechomonas ayalai	Monoxenous	28.0	8.042	TritrypDB-v.55	TritrypDB-v.55	Washington University SM
2	Crithidia bombi	Monoxenous	31.4	8.599	Companion	GenBank	[27]
3	Crithidia expoeki	Monoxenous	34.0	9.827	Companion	GenBank	[27]
4	Crithidia fasciculata CfCl	Monoxenous	41.3	9.055	TritrypDB-v.55	TritrypDB-v.55	Washington University SM
5	Endotrypanum monterogeii LV88	Dixenous	32.5	8.285	TritrypDB-v.55	TritrypDB-v.55	[33]
6	Endotrypanum monterogeii M907	Dixenous	2023-06-29	9.71	Augustus/GenemarkS	This study
7	Leishmania amazonensis M2269	Dixenous	32.4	8.664	TritrypDB-v.55	TritrypDB-v.55	[121]
8	Leishmania arabica	Dixenous	2023-01-31	8.646	TritrypDB-v.55	TritrypDB-v.55	Washington University SM
9	Leishmania braziliensis	Dixenous	32.3	8.484	TritrypDB-v.55	TritrypDB-v.55	[123]
10	Leishmania chagasi M6445	Dixenous	31.2	8.415	Companion	GenBank	[124]
11	Leishmania donovani	Dixenous	33.0	7.969	TritrypDB-v.55	TritrypDB-v.55	[125]
12	Leishmania enrietti	Dixenous	33.3	8.731	TritrypDB-v.55	TritrypDB-v.55	[127]
13	Leishmania gerbilli	Dixenous	33.1	8599	TritrypDB-v.55	TritrypDB-v.55	Washington University SM
14	Leishmania infantum	Dixenous	32.8	8.527	TritrypDB-v.55	TritrypDB-v.53	[122]
15	Leishmania macropodum	Dixenous	32.9	7.935	Companion	Yurchenko-Lab	[34]
16	Leishmania major Friedlin	Dixenous	32.3	8.424	TritrypDB-v.55	TritrypDB-v.55	[128]
17	Leishmania martiniquensis	Dixenous	32.4	7.967	TritrypDB-v.55	TritrypDB-v.55	[129]
18	Leishmania mexicana	Dixenous	32.0	8.144	TritrypDB-v.55	TritrypDB-v.55	[130]
19	Leishmania orientalis	Dixenous	34.1	8.158	TritrypDB-v.55	TritrypDB-v.55	[126]
20	Leishmania panamensis	Dixenous	2023-01-29	7.748	TritrypDB-v.55	TritrypDB-v.55	[131]
21	Leishmania tarentolae	Dixenous	35.4	8.703	TritrypDB-v.55	TritrypDB-v.55	[132]
22	Leishmania tropica	Dixenous	32.7	8.824	TritrypDB-v.55	TritrypDB-v.55	[133]
23	Leptomonas pyrrhocoris	Monoxenous	2023-04-30	9.878	TritrypDB-v.55	TritrypDB-v.55	[28]
24	Leptomonas seymouri	Monoxenous	2023-06-27	8.488	TritrypDB-v.55	TritrypDB-v.55	[83]
25	Lotmaria passim	Monoxenous	32.8	9.348	Companion	GenBank	[6]
26	Porcisia hertigi	Dixenous	2023-01-29	7.891	TritrypDB-v.55	TritrypDB-v.55	[33]
27	Zelonia costaricensis 169	Monoxenous	38.8	12.201	Augustus/GenemarkS	This study

## Sheet: Table S2
Percentage of repetitive element categories representation in the genome of Z. costaricensis and E. monterogeii.
Type Repetitive Element	Z. costaricensis	E. monterogeii
LTR (%)	0.28	0.0
LINE (%)	0.10	0.0
SINE (%)	0.23	0.20
rRNA (%)	0.39	0.0
Multigene family (%)	4.21	0.85
Unknown (%)	2.43	0.22
Other (%)	5.51	3.20
Total	13.16 %	4.47%

## Sheet: Table S3
Ortholog analysis using OrthoVenn version2 website
Species	Proteins	Clusters	Singletons
Z. costaricensis	12201	8235	1739
E. monterogeii	9711	7676	1630
L. major	8508	7732	171
P. hertigi	7891	7356	111

## Sheet: Table S4
Methods and models used in this phylogenomics analysis
Method	Models	Node support	Dataset 1*	Dataset 2 **	Tool
Maximum Lilkelihooed	JTT+G4+F	UFBS	x	x	IQ-Tree2
Maximum Lilkelihooed	PMSF	UFBS		x	IQ-Tree2
Maximum Lilkelihooed	JTT+G4+F	BS	x	x	IQ-Tree2
Maximum Lilkelihooed	PMSF	BS		x	IQ-Tree2
Inference Bayesian				x	MrBayes
UFBS	Ultra Fast Bootstrap
PMSF	Posterior mean site frequency
JTT	Jones, Taylor and Thornton model
G4	Four Gamma rate category
*Data set1:	3,384 single-copy genes
**Data set2:	99 BUSCO single-copy genes

## Sheet: Table S5
Number of gp63 proteins forming ortholog group in Endotrypanum monterogeii.
Ortholog Group	Number of genes	E. monterogeii M907	Number of Species
OG00000	406	69	21
OG00011	142	52	20
OG00470	29	1	25
OG07882	15	6	3
OG07885	15	2	4
OG08382	6	3	3
OG08383	6	2	3
OG08385	6	1	3
OG08386	6	4	2
OG08514	5	2	2
OG09062	3	2	2

## Sheet: Table S6
List of specific enzimes for L. major F.
Oxidorecductases	Name	Pathway	ID code
1.1.1.3	homoserine dehydrogenase	Threonine Metabolism	LmjF.07.0260
1.14.18.9	4α-methylsterol monooxygenase	Steroid biosynthesis	LmjF.36.2540
Transferases
2.1.1.13	methionine synthase	Cysteine and methionine metabolism	LmjF.07.0090
2.5.1.17	corrinoid adenosyltransferase	Porphyrin and chlorophyll metabolism	LmjF.24.2240
2.7.1.31	glycerate 3-kinase	Glycerolipid metabolism	LmjF.02.0500
2.7.1.153	phosphatidylinositol-4,5-bisphosphate 3-kinase	Inositol phosphate metabolism	LmjF.14.0020
Hydrolases
3.1.3.6	3′-nucleotidase	Purine and Pyrimidine metabolism	LmjF.31.2310
3.5.1.1	asparaginase	Cyanoamino acid metabolism	LmjF.15.0390
Lyases
4.2.1.46	dTDP-glucose 4,6-dehydratase	Biosynthesis of secondary metabolites	LmjF.26.2230
4.3.2.9	γ-glutamylcyclotransferase	Gluthatione metabolism	LmjF.20.0440
Isomerases
5.1.99.1	methylmalonyl-CoA epimerase	Propanoate metabolism	LmjF.26.0020
5.4.99.2	methylmalonyl-CoA mutase	Propanoate metabolism	LmjF.27.0300
Ligases
6.4.1.3	propionyl-CoA carboxylase	Biosynthesis of secondary metabolites	LmjF.28.0490

## Sheet: Table S7
Summary of specific enzymes for Zelonia costaricensis, Endotrypanum monterogeii, and specific between Z. costaricensis and Leishmania major.
	Zelonia costaricensis
Oxidorecductases	Name	Pathway	ID code
1.1.1.27	L-lactate dehydrogenase	Glycolysis and Gluconeogenesis	ZCos.00634
1.4.99.1	D-amino-acid-dehydrogenase	Phenylalanine Metablism	ZCos.05976
1.11.1.6	Catalase	Tryptophan Metabolism	ZCos.10192	ZCos.11402
1.14.13.39	nitric-oxide synthase	Arginine and proline Metabolism	ZCos.06839
Transferases
2.3.1.9	Acetyl-CoA C-acetyltransferase	Fatty acid degradation	ZCos.00819
2.7.1.100	S-methyl-5-thioribose kinase	Alanine aspartate and glutamate Metabolism	ZCos.02500
Hydrolases
3.2.1.21	beta-glucosidase	Starch and sucrose Metabolism	ZCos.02363
3.5.1.11	Penicillin amidase / penicillin acylase	Penicillin biosynthesis	ZCos.06103
Lyases
4.1.1.1	Pyruvate decarboxylase	Glycolysis and Gluconeogenesis	ZCos.00467
4.3.2.1	Argininosuccinate lyase	Alanine, aspartate and glutamate Metabolism	ZCos.06307
Taxa	Endotrypanum monterogeii M907
Hydrolases
3.2.1.18	Exo-alpha-sialidase	Sphingolipid metabolism	Emon224.7737	EMOLV88_040012800
Isomerases
5.4.2.10	Phosphoglucosamine mutase	Amino sugar and nucleotide sugar Metabolism	Emon224.3920	EMOLV88_340038400
Taxa	Z. costaricensis and L. major
Oxidorecductases	Name	Pathway	ID code
1.1.1.3	homoserine dehydrogenase	Threonine Metabolism	ZCos.04077	LmjF.07.0260
1.3.3.4	protoporphyrinogen oxidase	Porphyrin chlorophyll Metabolism	ZCos.09461
1.3.5.3	protoporphyrinogen IX dehydrogenase		ZCos.09461
Transferases
2.1.1.13	Methionine synthase	Cysteine and methionine Metabolism	ZCos.03071	LmjF.07.0090
2.3.2.4	gamma-glutamylcyclotransferase	Glutathione Metabolism	ZCos.05491
2.5.1.17	corrinoid adenosyltransferase	Porphyrin and chlorophyll metabolism	ZCos.02275	LmjF.24.2240
2.7.1.31	glycerate 3-kinase	Glycerolipid metabolism	ZCos.07607	LmjF.02.0500
2.7.1.153	phosphatidylinositol-4,5-bisphosphate 3-kinase	Inositol phosphate metabolism	ZCos.01673	LmjF.14.0020
Hydrolases
3.5.1.1	asparaginase	Cyanoamino acid metabolism	ZCos.07259	LmjF.15.0390
Isomerases
5.1.99.1	methylmalonyl-CoA epimerase	Propanoate metabolism	ZCos.04941	LmjF.26.0020
5.4.99.2	methylmalonyl-CoA mutase	Propanoate metabolism	ZCos.01829	LmjF.27.0300
Ligases
6.4.1.3	propionyl-CoA carboxylase	Biosynthesis of secondary metabolites	ZCos.00404	LmjF.28.0490
Taxa		Z. costaricensis and E. monterogeii M907
1.3.5.3	Protoporphyrinogen oxidase	Heme pathway	Zcos.09461
1.3.3.3	Coproporphyrinogen III oxidase	Heme pathway	Zcos.02200
4.99.1.1	Ferrochelatase	Heme pathway	Zcos.07359
Taxa		Z. costaricensis and E. monterogeii M907
Glycerophospholipid metabolism	3.1.1.32	Phospholipase A1	Zcos.07275	Emon224.8950		*
